# Supplementary material for: Contrast-enhanced CT-based radiomics nomogram for the preoperative prediction of perineural invasion in colorectal cancer: a two-center study
Source: Research Square preprint supplement (doi:10.21203/rs.3.rs-6970474/v1), 2025-11-04
Supplement: Supplementary file 1 [file 3882ed977986565874b30196.pdf]

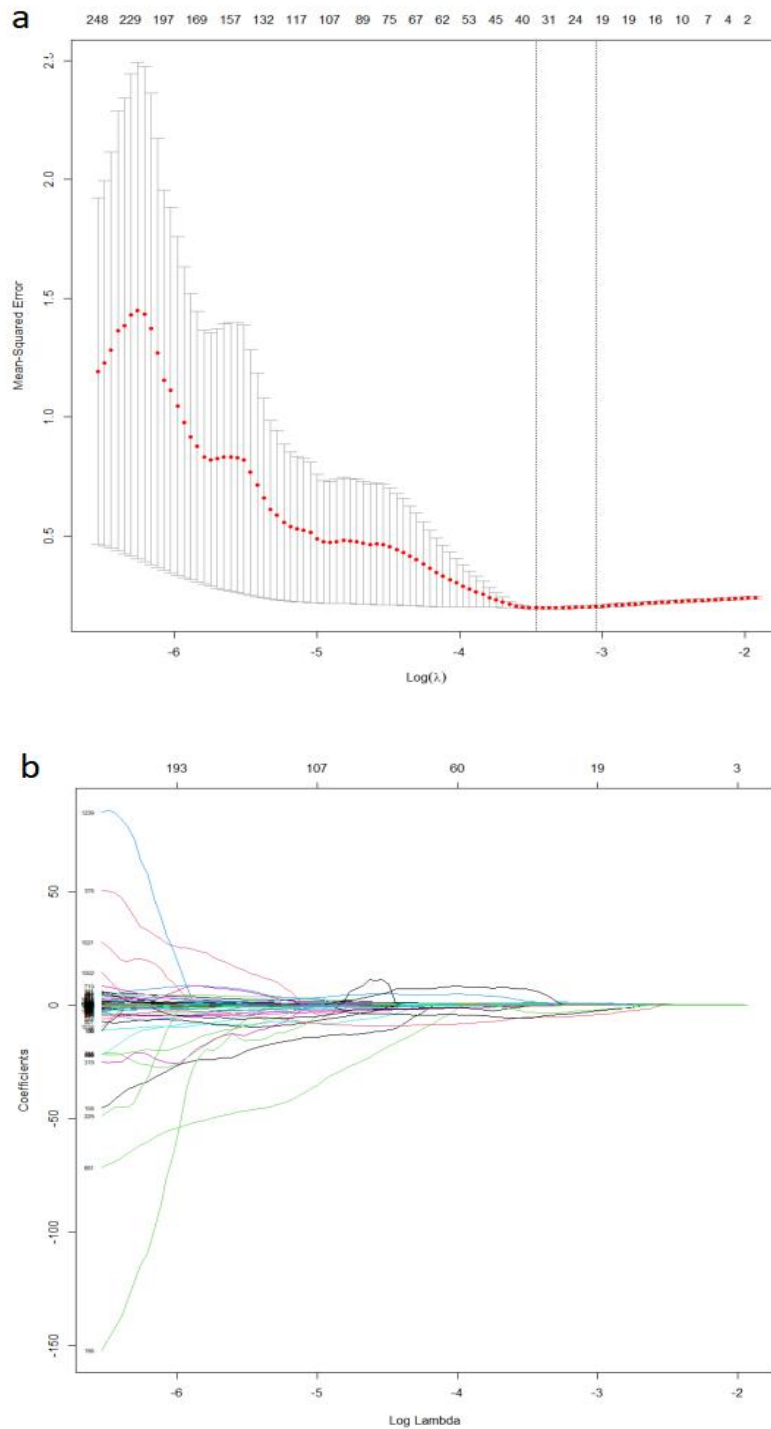

**Fig. S1** LASSO coefficients of radiomics features. (a) A coefficient profile plot was produced against the  $\log(\lambda)$  sequence. (b) feature selection was performed by using the least absolute shrinkage and selection operator (LASSO) logistic regression model

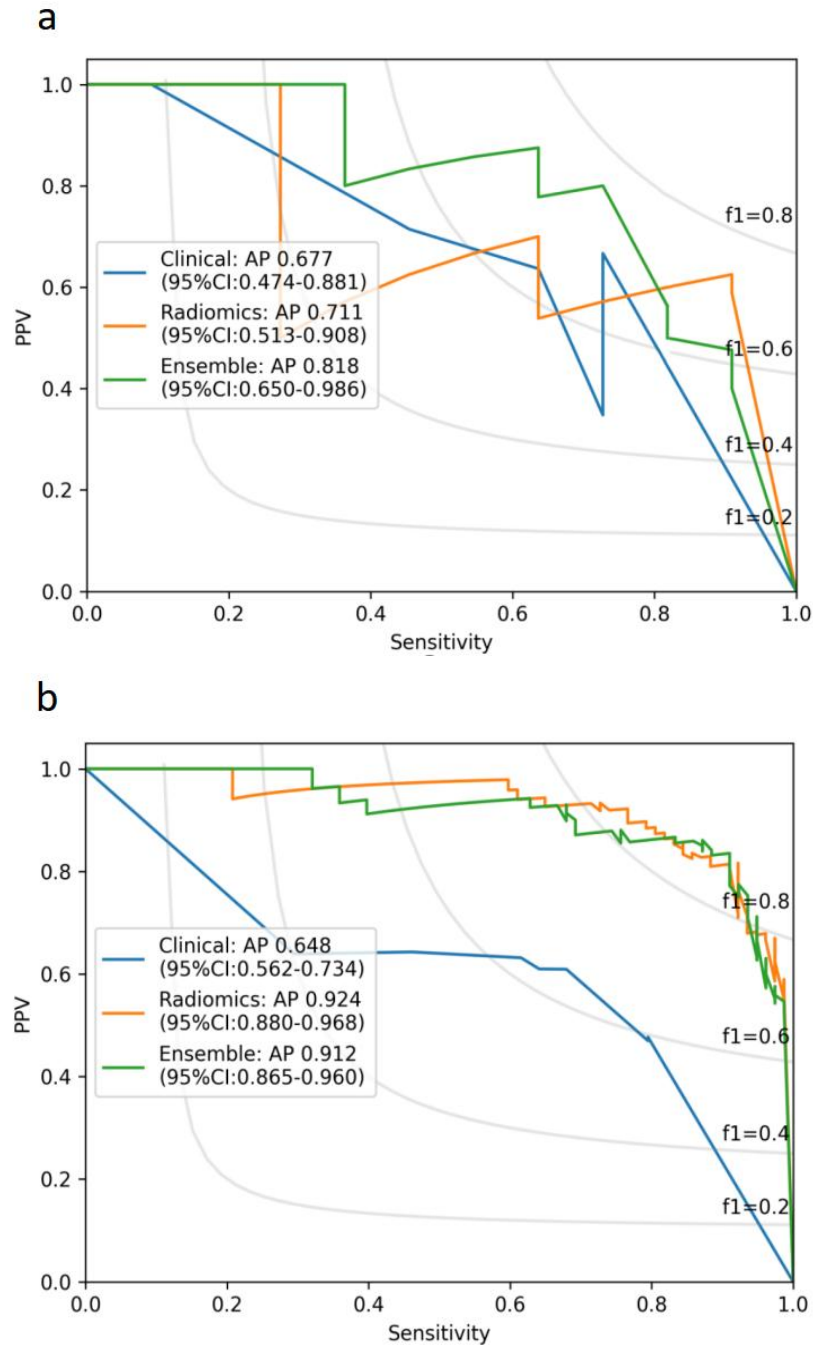

**Fig. S2** The comparisons of precision-recall curves in this study. (a): In the internal validation set: AP = 0.677 for the clinical model, 0.711 for the radiomics model, and 0.818 for the ensemble model; (b): In the external testing set: AP = 0.648 for the clinical model, 0.924 for the radiomics model, and 0.912 for the ensemble model. AP: average precision

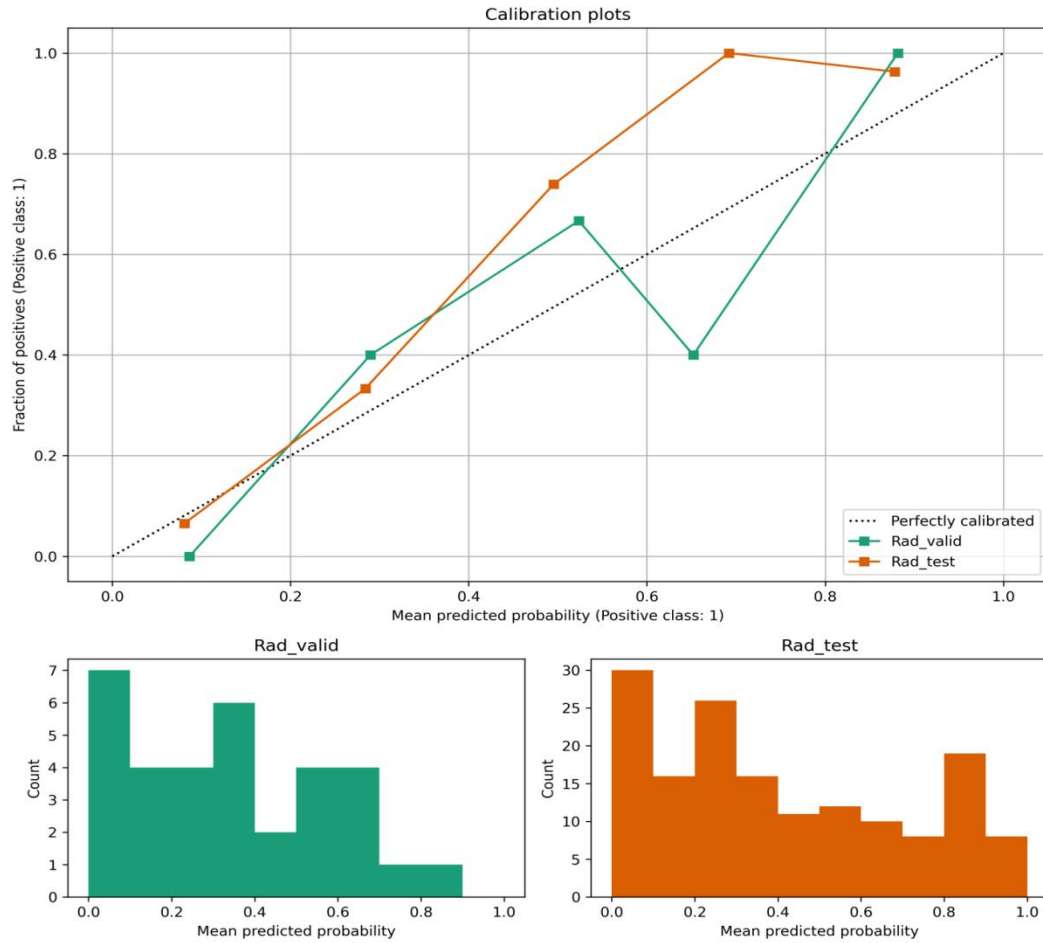

**Fig. S3** Calibration curves of the radiomics model in this study. (a) Internal validation set (the green solid line and histogram); (b) External testing set (the orange solid line and histogram).  $P > 0.05$  in the Hosmer–Lemeshow test for the internal validation and external testing sets, indicating an appropriate agreement between the predicted perineural invasion status and actual observed perineural invasion status. The y-axis represents the actual perineural invasion probability. The x-axis represents the predicted perineural invasion probability. The black dotted line represents the best model with the perfect agreement. The green and orange solid lines have a closer fit to the black dotted line represents the radiomics model has a better calibration.

**Table S1** The parameters of CT scanning and contrast agents used by the two centers

| Parameter            | Center 1               | Center 2        |
|----------------------|------------------------|-----------------|
| Machine model        | Philips Brilliance iCT | GE Optima CT680 |
| Tube current         | 300 mA                 | 350mA           |
| Tube voltage         | 120 kV                 | 120 kV          |
| Slice thickness      | 5 mm                   | 1.5mm           |
| Rotation time        | 0.75 s                 | 0.5s            |
| Pitch                | 0.993                  | 1.375           |
| Detector collimation | 128×0.625 mm           | 128×0.625 mm    |
| Matrix               | 512×512                | 512×512         |
| FOV                  | 350×350 mm             | 400×400 mm      |
| Contrast agent       | Ioversol               | Ioversol        |
| Contrast dose        | 75ml                   | 75ml            |
| Injection rate       | 3.5ml/s                | 3.5ml/s         |

**Table S2** The detailed search space of nine candidate classifiers.

| classifier             | Parameter search space                                                                                                                                   |
|------------------------|----------------------------------------------------------------------------------------------------------------------------------------------------------|
| Support Vector Machine | Kernal = linear, rbf<br>C = -4 – 4<br>Gamma = (1, 2, 3, 'auto')<br>Shrinking = True, False                                                               |
| Logistic Regression    | Penalty = L1, L2<br>C =-4 – 4<br>Solver = liblinear, lbfgs                                                                                               |
| Naive Bayes            | Var_smoothing = 1e-9                                                                                                                                     |
| Multi-layer Perceptron | Alpha=10 ** -arange(1, 10)<br>Activation = tanh, relu<br>Solver = adam<br>Learning_rate = adaptive<br>Tol=1e-5<br>Layers = [input, input * 10, output=2] |
| K-nearest Neighbors    | Weights = uniform, distance<br>Algorithm = auto, ball_tree, kd_tree, brute<br>Leaf_size = 1, 2, 3<br>N_neighbors = 2, 8                                  |
| Decision Tree          | Max_depth = 20-200<br>Min_samples_leaf = 1,5,10,20,50,100                                                                                                |

|               |                                    |
|---------------|------------------------------------|
|               | Max_features = auto, sqrt          |
|               | Min_samples_split = 2, 5, 10       |
| Random Forest | N_estimator = 200 – 1000           |
|               | Max_features = auto, sqrt          |
|               | Max_depth = 10 – 110               |
|               | Min_samples_split = 2, 5, 10       |
|               | Min_samples_leaf = 10, 20, 50, 100 |
|               | Bootstrap = True, False            |
| ADABOOST      | N_estimators = 200 – 1000          |
| XGBoost       | Objective = binary:logistic        |
|               | N_estimators = 200 – 1000          |
|               | Max_depth = 10                     |

---
